# Supplementary material for: Ruthenium-catalyzed electrochemical C–H activation of benzamidine hydrochlorides with internal alkynes for the synthesis of 1-aminoisoquinolines
Source: Royal Society of Chemistry journal article supplement (doi:10.1039/d4ob01381f), 2024-01-01
Supplement: d4ob01381f1.pdf [file d4ob01381f1.pdf]

## ***Supporting information***

### **Visible-light-enhanced synergistic catalysis of AuCu nanostructures immobilized within porous support**

Ajay<sup>a</sup>, Heeralal Jaipal<sup>a</sup>, Ryo Watanabe<sup>b</sup>, Choji Fukuhara<sup>b</sup> and Priyanka Verma<sup>a\*</sup>

<sup>a</sup>*Department of Chemistry, Indian Institute of Technology Delhi, Hauz Khas, New Delhi 110016, India*

*E-mail: [pverma@chemistry.iitd.ac.in](mailto:pverma@chemistry.iitd.ac.in)*

<sup>b</sup>*Department of Applied Chemistry and Biochemical Engineering, Graduate School of Engineering, Shizuoka University, 3-5-1 Johoku, Naka-ku, Hamamatsu, Shizuoka 432-856, Japan*

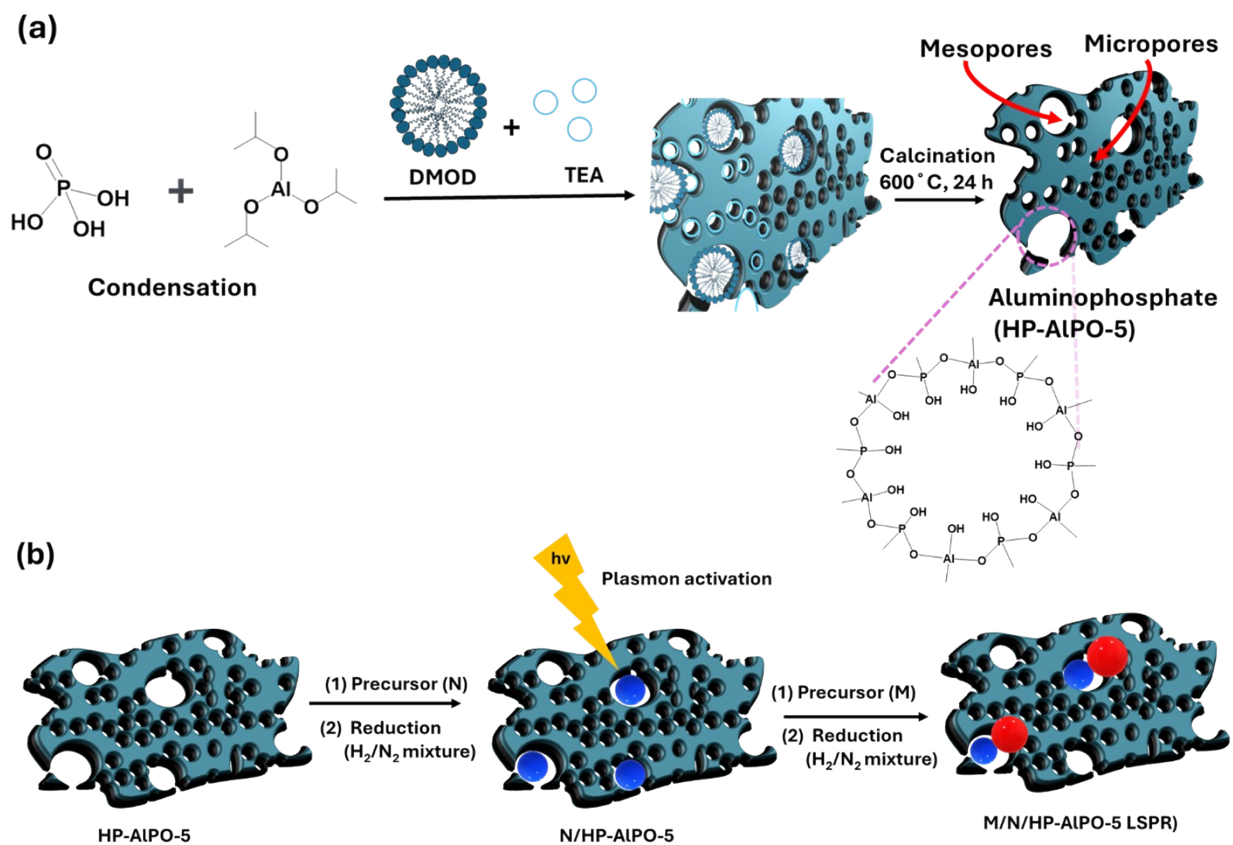

**Figure S1.** (a and b) Schematic representation of synthesis procedure of bimetallic (Au (red) and Cu (blue)) NPs incorporated HP-AlPO-5

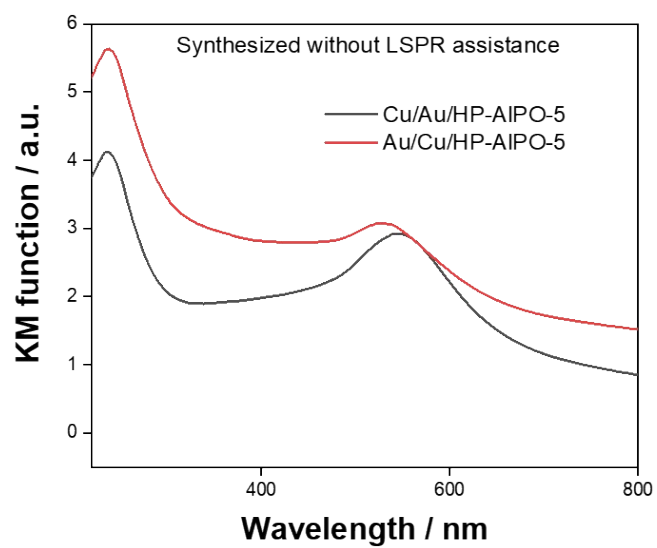

**Figure S2.** UV-vis spectra of bimetallic Cu/Au/HP-AIPO-5 and Au/Cu/HP-AIPO-5 synthesized without LSPR-assistance

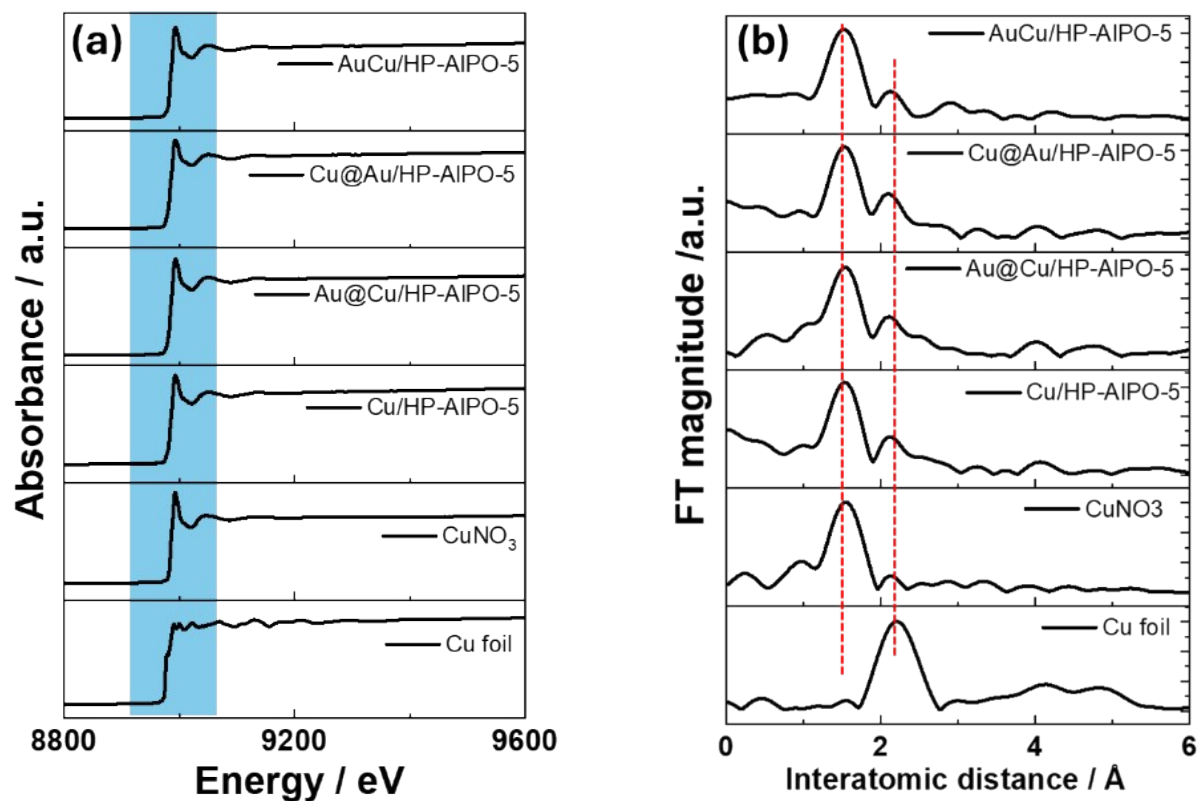

Figure S3 (a) XANES of Cu K-edge and (b) FT-EXAFS of Cu K-edge of the prepared catalysts.

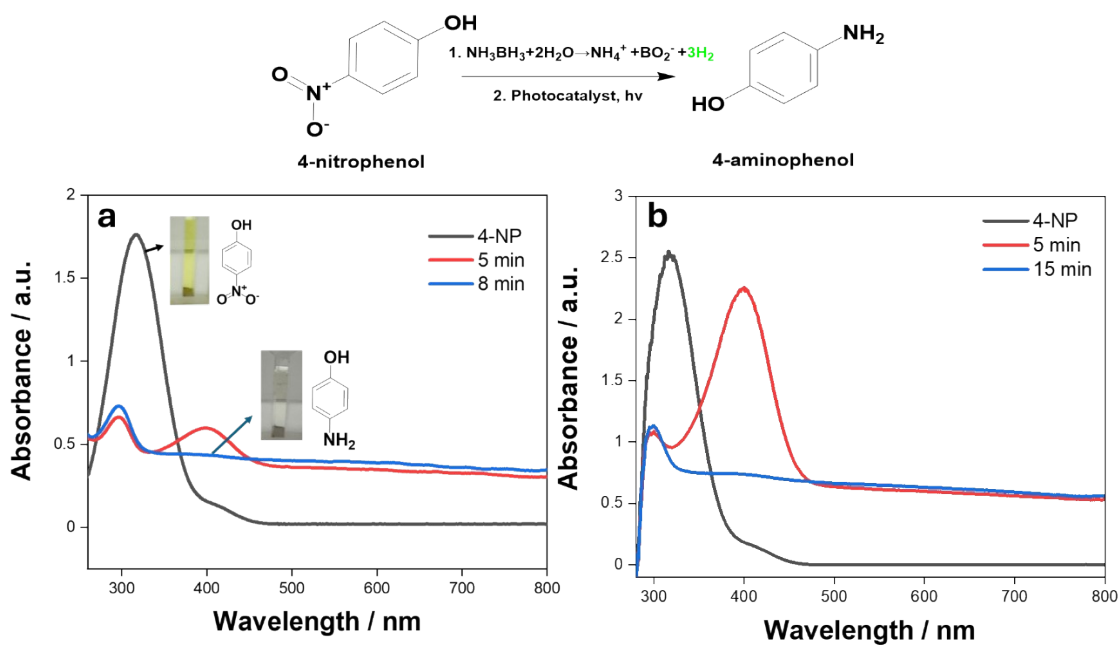

**Figure S4** Catalytic activity of the most active Cu/Au/HP-APO-5 in the (a) presence of light and (b) absence of light.

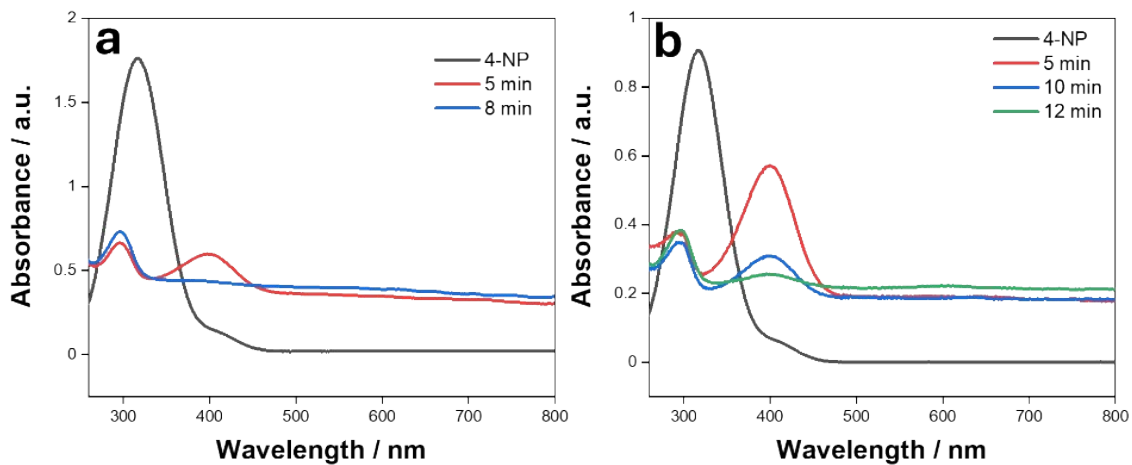

**Figure S5** Reusability test of Cu/Au/HP-AIPO-5, (a) fresh sample and (b) 1<sup>st</sup> cycle.

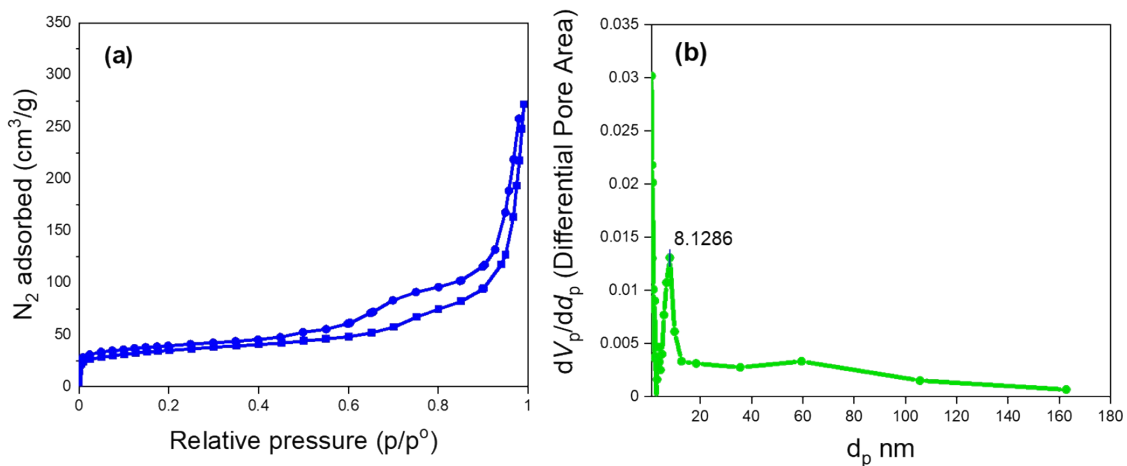

**Figure S6** BET surface analysis of HP-AlPO-5 (a) nitrogen adsorption-desorption isotherm and (b) BJH plot of pore size distribution.

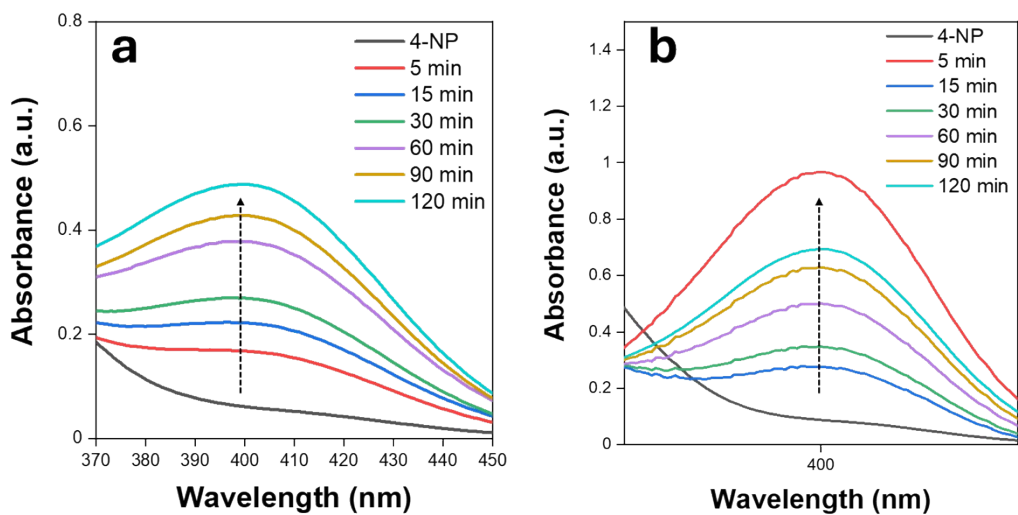

**Figure S7** Reduction of 4-NP without using a catalyst in the (a) dark and (b) in the presence of light irradiation.
